# Supplementary material for: A 14-3-3 Protein Ca16R Acts Positively in Pepper Immunity against Ralstonia solanacearum by Interacting with CaASR1
Source: MDPI journal article supplement (doi:10.3390/plants13101289), 2024-05-07
Supplement: s1 [file s1]

**Table S1. Primers used in this study.**

|                                      | Gene                           | Forward primer                                           | Reverse primer                                         |
|--------------------------------------|--------------------------------|----------------------------------------------------------|--------------------------------------------------------|
| Primers used for <i>Ca16R</i> study  | <i>Ca16R</i> <sup>1</sup>      | GGGGACAAGTTTGTACAAAAAAGCAGGCTT<br>C ATGGCGTCGCCACGTGAGGA | GGGGACCACTTTGTACAAGAAAGCTGGGTCTC<br>ATTCATTATCTGGTTTCG |
|                                      | <i>Ca16R-GFP</i> <sup>2</sup>  | GGGGACAAGTTTGTACAAAAAAGCAGGCTT<br>C ATGGCGTCGCCACGTGAGGA | GGGGACCACTTTGTACAAGAAAGCTGGGTCTTC<br>ATTATCTGGTTTCG    |
|                                      | <i>Ca16R-VIGS</i> <sup>3</sup> | GGGGACAAGTTTGTACAAAAAAGCAGGCTT<br>CCGCTGAAAGGAAAGAAGCTG  | GGGGACCACTTTGTACAAGAAAGCTGGGTCTC<br>ATCCTGCATATCGGAGGT |
| Primers used for qPCR analysis study | <i>Ca16R</i> -qPCR             | CGTGATCATGGCAAAGCTGG                                     | CCACGGTTAACTCCTCTCCG                                   |
|                                      | <i>CaASR1</i> -qPCR            | ACATGTCGGAGAACTCGGTG                                     | TATCTTGTGCCTGTGTGCGT                                   |
|                                      | <i>CaPRI</i> -qPCR             | GCCGTGAAGATGTGGGTCAATGA                                  | TGAGTTACGCCAGACTACCTGAGTA                              |
|                                      | <i>CaNPRI</i> -qPCR            | ACTTCTTCGCCGACGCCAAG                                     | GCCAACACATTACCAGAGCATC                                 |
|                                      | <i>CaDEF1</i> -qPCR            | GTGAGGAAGAAGTTTGAAAGAAAGTAC                              | TGCACAGCACTATCATTGCATACAATTC                           |
|                                      | <i>CaCOII</i> -qPCR            | ATAATGAGCAAGCAGGAAA                                      | TGTCAAGAAGGGCATAAAG                                    |
|                                      | <i>Ca14-3-3 6</i> -qPCR        | GACGAGCATCATGGCGGATA                                     | ATCACCAGTAGCAGCCGAAC                                   |
|                                      | <i>Ca14-3-3 2</i> -qPCR        | GCCTACAAAGCTGCTCAGGA                                     | CACGGTCGGGAGAGTTCAAA                                   |
|                                      | <i>Ca14-3-3 C</i> -qPCR        | GCGTGAGGAGAACGTGTACA                                     | ATACGCCACGATGCTCTACG                                   |
|                                      | <i>CaACTIN</i> -qPCR           | AGGGATGGGTCAAAAGGATGC                                    | GAGACAACACCGCCTGAATAGC                                 |
|                                      | <i>NbPRI</i> -qPCR             | ATGGGATTTGTTCTCTTTTCA                                    | TTAGTATGGACTTTCGCCTCT                                  |
|                                      | <i>NbCOII</i> -qPCR            | CCCANAAAGCATCCATCTCAC                                    | GAAGATCTTGAATTGATGGC                                   |
|                                      | <i>NbEF-1a</i> -qPCR           | TGCTGCTGTAACAAGATGGATGC                                  | GAGATGGGGACAAAGGGGATT                                  |

2 <sup>1</sup>Primers used for *Ca16R* full-length cloning3 <sup>2</sup>Primers used for 35S:*Ca16R-GFP* construct4 <sup>3</sup>Primers used for pTRV:*Ca16R* construct

## 5 Supplemental figures

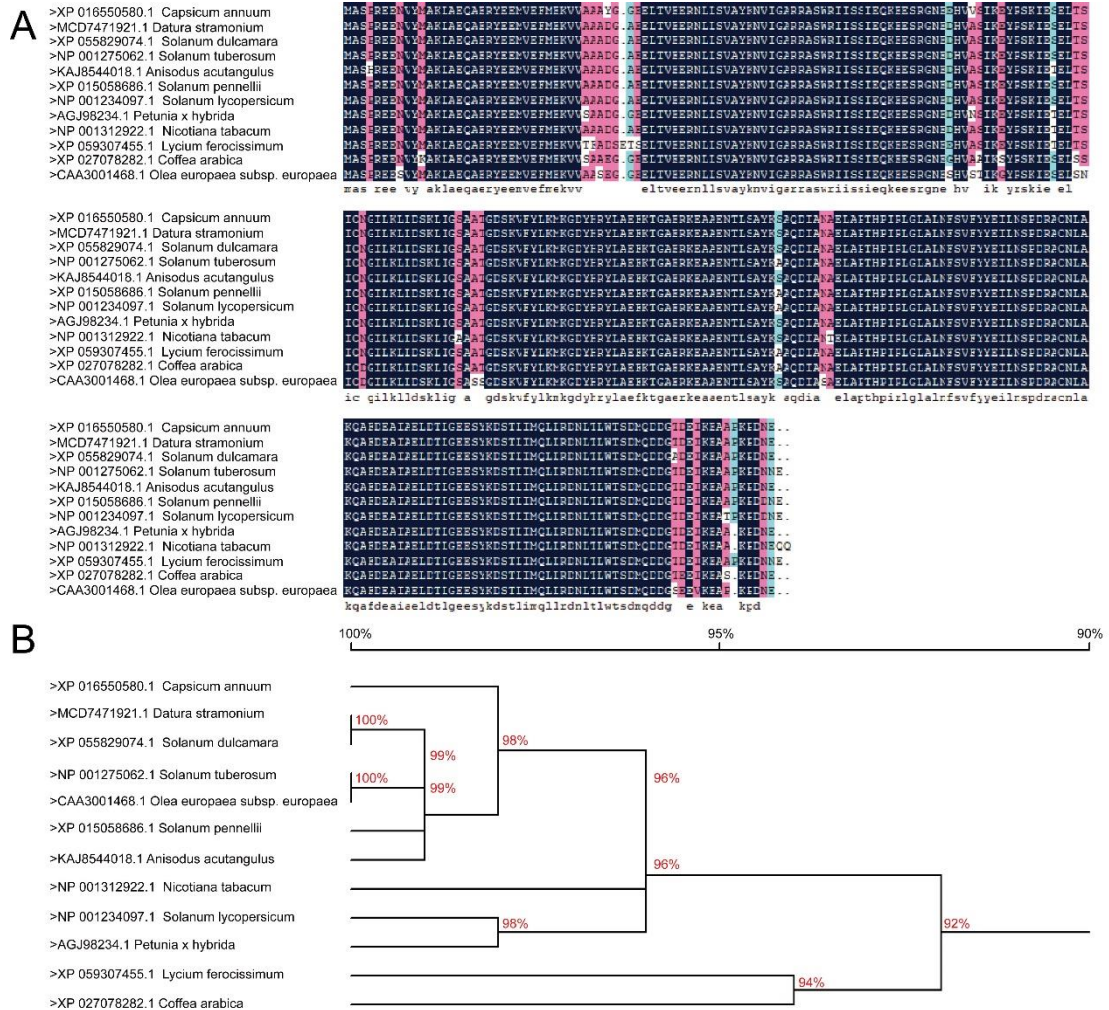

**Figure S1.** The sequence comparison of Ca16R with its orthologues in other plant species. (A) Multiple alignment of deduced amino acid sequence of Ca16R with its orthologues in other plant species including *Datura stramonium* (MCD7471921.1); *Solanum dulcamara* (XP\_055829074.1); *Solanum tuberosum* (NP\_001275062.1); *Olea europaea* (CAA3001468.1); *Solanum pennellii* (XP\_015058686.1); *Anisodus acutangulus* (KAJ8544018.1); *Nicotiana tabacum* (NP\_001312922.1); *Solanum lycopersicum* (NP\_001234097.1); *Petunia x hybrida* (AGJ98234.1); *Lycium ferocissimum* (XP\_059307455.1); *Coffea Arabica* (XP\_027078282.1); (B) Phylogenetic analysis of Ca16R with its orthologues in other plant species including *Datura stramonium*; *Solanum dulcamara*; *Solanum tuberosum*; *Olea europaea*; *Solanum pennellii*; *Anisodus acutangulus*; *Nicotiana tabacum*; *Solanum lycopersicum*; *Petunia x hybrida*; *Lycium ferocissimum*; *Coffea arabica*.

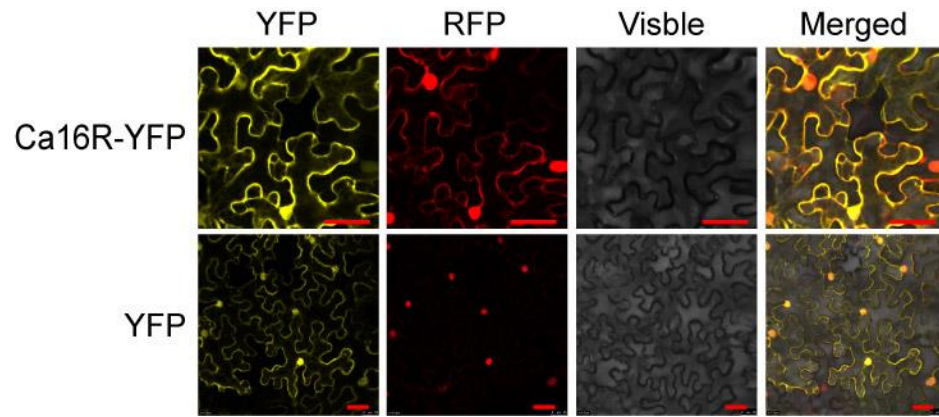

**Figure S2.** Subcellular localization of Ca16R in epidermal cells of *Nicotiana benthamiana* leaves. The *Nicotiana benthamiana* leaves were infiltrated with *A.tumefaciens* strain GV3101 containing the 35S:Ca16R-YFP construct. YFP and RFP fluorescence was imaged using a Confocal Microscope at 48 hpi. The histone NbH2B-RFP as a marker to indicate the nucleus and bar is 25  $\mu$ m.

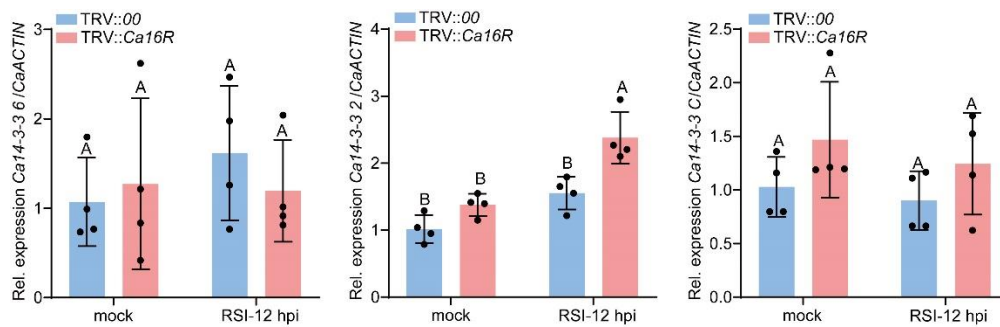

**Figure S3.** The specificity of Ca16R silencing. The RNA isolated from mock treated and RSI (at 12 hpi) challenged TRV:Ca16R and TRV:00 pepper plants were subjected to RT-qPCR using specific primer pairs of *Ca14-3-3 6*, *Ca14-3-3 2* and *Ca14-3-3 C*, which shares the highest sequence similarity to *Ca16R* among all members of 14-3-3 family in pepper, the effect of *Ca16R* silencing on transcript levels of *Ca14-3-3 6*, *Ca14-3-3 2* and *Ca14-3-3 C* were assayed. Data were shown as means  $\pm$  standard error of four replicates. Different uppercase letters above the bars indicated significant differences between means ( $P < 0.01$ ) by Fisher's protected LSD test.
